# Supplementary material for: The P-type ATPase inhibiting potential of polyoxotungstates
Source: Royal Society of Chemistry journal article supplement (doi:10.1039/c7mt00279c), 2018-01-01
Supplement: c7mt00279c1.pdf [file c7mt00279c1.pdf]

## ELECTRONIC SUPPLEMENTARY INFORMATION

### The P-type ATPase inhibiting potential of polyoxotungstates

Nadiia Gumerova<sup>a</sup>, Lukáš Krivosudský<sup>a,b</sup>, Gil Fraqueza<sup>c,d</sup>, Joscha Breibeck<sup>a</sup>, Emir Al-Sayed<sup>a</sup>, Elias Tanuhadi<sup>a</sup>, Aleksandar Bijelic<sup>a</sup>, Juan Fuentes<sup>c</sup>, Manuel Aureliano<sup>c,e\*</sup> and Annette Rompel<sup>a\*</sup>

<sup>a</sup> Universität Wien, Fakultät für Chemie, Institut für Biophysikalische Chemie, Althanstr. 14, 1090 Wien Austria, <http://www.bpc.univie.ac.at>; E-mail: [annette.rompel@univie.ac.at](mailto:annette.rompel@univie.ac.at).

<sup>b</sup> on leave from: Comenius University, Faculty of Natural Sciences, Department of Inorganic Chemistry, Mlynská dolina, Ilkovičova 6, 842 15 Bratislava, Slovakia.

<sup>c</sup> Centre of Marine Sciences, University of Algarve, 8005-139 Faro, Portugal.

<sup>d</sup> Institute of Engineering, University of Algarve, 8005-139 Faro, Portugal.

<sup>e</sup> Faculty of Sciences and Technology, University of Algarve, 8005-139 Faro, Portugal, E-mail: [maalves@ualg.pt](mailto:maalves@ualg.pt).

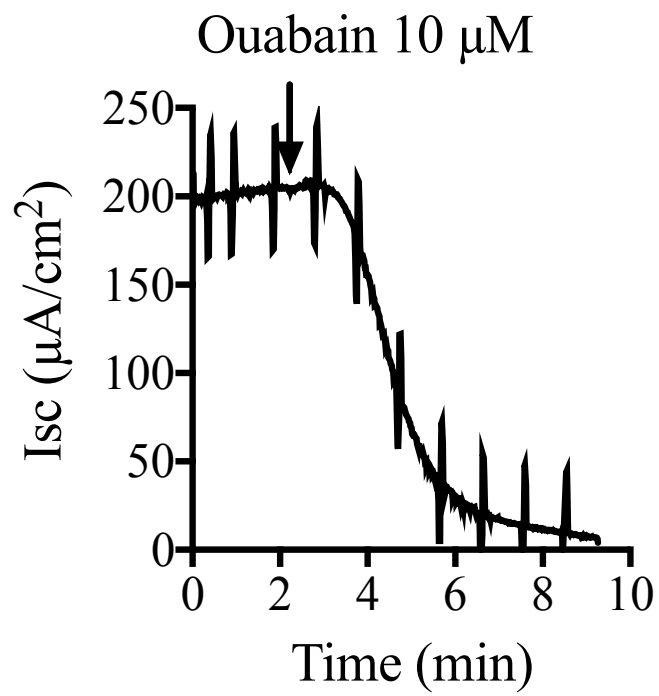

**Figure S1.** Original trace for ouabain of the effect of short circuit current ( $I_{sc}$ ,  $\mu\text{A}/\text{cm}^2$ ) in the opercular epithelium of killifish mounted in Ussing chambers and kept under voltage clamp ( $V_t = 0$  mV). Effective time 50 ( $ET_{50}$ ) and maximum inhibitory effects were calculated based on three independent experiments. Ouabain (10  $\mu\text{M}$ ) showed a maximum inhibition value of 100 % and an  $ET_{50}$  of  $3.2 \pm 0.2$  minutes.
